# Disentangling the origins of confidence in speeded perceptual judgments through multimodal imaging

Running title: Decision commitment improves confidence

Michael Pereira<sup>1,2,3\*</sup>, Nathan Faivre<sup>2,3,4\*</sup>, Iñaki Iturrate<sup>1,2\*</sup>, Marco Wirthlin<sup>2,3</sup>, Luana Serafini<sup>2,3,5</sup>,  
Stéphanie Martin<sup>1,2</sup>, Arnaud Desvachez<sup>1,2</sup>, Olaf Blanke<sup>1,2,6</sup>, Dimitri Van De Ville<sup>2,7,8</sup>, José del R.  
Millán<sup>1,2</sup>

## Affiliations

1 Defitech Foundation Chair in Brain-Machine Interface, École Polytechnique Fédérale de Lausanne, Geneva, Switzerland

2 Center for Neuroprosthetics, École Polytechnique Fédérale de Lausanne, Geneva, Switzerland

3 Laboratory of Cognitive Neuroscience, Brain Mind Institute, Faculty of Life Sciences, École Polytechnique Fédérale de Lausanne, Geneva, Switzerland

4 Centre d'Economie de la Sorbonne, CNRS UMR 8174, Paris, France

5 Department of Biomedical, Metabolic and Neural Sciences, University of Modena and Reggio Emilia, Modena, Italy

6 Department of Neurology, University Hospital Geneva, Geneva, Switzerland

7 Medical Image Processing Lab, Institute of Bioengineering, École Polytechnique Fédérale de Lausanne, Geneva, Switzerland

8 Department of Radiology and Medical Informatics, University of Geneva, Geneva, Switzerland

\* These authors contributed equally to this study

Corresponding author:

Michael Pereira

[michael.pereira@epfl.ch](mailto:michael.pereira@epfl.ch)

Laboratory of Cognitive Neuroscience

Campus Biotech H4

Chemin des Mines 9,

1202 Genève, Switzerland

Keywords: metacognition, error monitoring, confidence, EEG, fMRI, race modeling, inferior frontal gyrus, insula, anterior prefrontal cortex

## 1 Abstract

2 The human capacity to compute the likelihood that a decision is correct - known as  
3 metacognition - has proven difficult to study in isolation as it usually co-occurs with decision-  
4 making. Here, we isolated post-decisional from decisional contributions to metacognition by  
5 combining a novel paradigm with multimodal imaging. Healthy volunteers reported their  
6 confidence in the accuracy of decisions they made or decisions they observed. We found  
7 better metacognitive performance for committed vs. observed decisions, indicating that  
8 committing to a decision informs confidence. Relying on concurrent electroencephalography  
9 and hemodynamic recordings, we found a common correlate of confidence following  
10 committed and observed decisions in the inferior frontal gyrus, and a dissociation in the  
11 anterior prefrontal cortex and anterior insula. We discuss these results in light of decisional  
12 and post-decisional accounts of confidence, and propose a generative model of confidence  
13 in which metacognitive performance naturally improves when evidence accumulation is  
14 constrained upon committing a decision.

## 15 Introduction

16 Upon making decisions, one usually “feels” that a given choice was correct or not, which  
17 allows deciding whether to commit to the choice, to seek more evidence under uncertainty,  
18 or to change one’s mind and go for another option. This crucial aspect of decision making  
19 relies on the capacity to monitor and report one’s own mental states, which is commonly  
20 referred to as metacognitive monitoring (Fleming et al., 2012; Koriat, 2006). One promising  
21 venue to unravel the neural and cognitive mechanisms of metacognitive monitoring involves  
22 investigating how, and to what extent, humans become aware of their own errors (Yeung &  
23 Summerfield, 2012). Typically, volunteers are asked to execute a first-order task under time  
24 pressure (e.g., numerosity: which of two visual arrays contains more dots) and afterward  
25 perform a second-order task by providing an estimate of confidence in their response (“how  
26 sure were you that your response was correct?”). Confidence is formally defined as the  
27 probability that a first-order response was correct given the available evidence (Pouget et al.,  
28 2016). Distinct models have been proposed to explain how confidence is computed: some  
29 models consider confidence as a fine-grained description of the same perceptual evidence  
30 leading to the first-order decision (Kiani & Shadlen, 2009), sometimes enriched with post-  
31 decisional processes (Pleskac et al., 2010, Van Den Berg et al., 2016; Fleming et al., 2017).  
32 Other models posit that confidence stems from mechanisms different from those responsible  
33 for making that decision (for review, see Grimaldi et al., 2015). However, as of today, the  
34 contribution of (post-)decisional signals on confidence remains unclear, principally due to the  
35 difficulty of dissociating confidence from first-order decision-making.

36 Here we combined a novel paradigm with multimodal neuroimaging to dissociate confidence  
37 from decision-making. Our paradigm allowed a controlled comparison of confidence ratings  
38 for decisions that were *committed* (i.e., taken and reported by participants), and decisions  
39 that were merely *observed* (i.e., taken by a computer). Hereby, we could isolate the  
40 contribution of decisional signals to confidence (Figure 1A). In the *active* condition, 20  
41 participants were presented with two arrays of dots for 60 ms and were asked to indicate

42 which of the two arrays contained more dots by pressing a button with the left or right hand  
43 (numerosity first-order task). At the end of each trial, participants had to report their  
44 confidence in their response being correct or incorrect using their left hand (second-order  
45 task). The *observation* condition followed the exact same procedure, except that the first-  
46 order task was performed automatically: participants saw the image of a hand over the right  
47 or left array of dots with identical yet shuffled timings and choice accuracy (i.e., observation  
48 trials were a shuffled replay of active trials, see methods). They were then asked to report  
49 their confidence in the observed decision. This allowed us to quantify metacognition for  
50 committed (active condition) compared to observed (observation condition) decisions while  
51 keeping perceptual evidence, first-order performance, and timing constant across conditions.  
52 Both conditions were performed while recording simultaneous electroencephalography  
53 (EEG) and functional magnetic resonance imaging (fMRI), to constrain blood-oxygenation  
54 level dependent (BOLD) correlates of confidence to electrophysiological processes occurring  
55 immediately after the committed or observed decision.

56 Data collection was conducted in view of testing three pre-registered hypotheses  
57 (<https://osf.io/a5qmv>). At the behavioral level, assuming that signals associated with overt  
58 decisions inform confidence judgments, we expected confidence ratings to better track first-  
59 order performance for committed compared to observed decisions. Based on several  
60 findings showing a role of action monitoring for confidence (e.g., Fleming & Daw, 2017;  
61 Fleming et al., 2015; Faivre et al., 2018), we expected brain regions encoding confidence  
62 specifically for committed decisions to be related to the cortical network involved in action  
63 monitoring, and brain regions conjunctively activated in both conditions to reflect a shared  
64 mechanism independent from decision commitment. Finally, we expected to find earlier  
65 correlates of confidence following committed compared to observed responses, as efferent  
66 information is available before visual information (Holroyd and Coles, 2002).

67

## 68 Results

### 69 **Better metacognitive performance for committed compared to observed decisions**

70 The influence of decision commitment on second-order judgments was assessed by  
71 comparing metacognitive performance for committed compared to observed decisions. The  
72 first-order task consisted of indicating which of two arrays contained more dots (active  
73 condition), or observing a hand making that decision (observation condition) (Figure 1A). By  
74 design, first-order performance was identical in the two conditions (see Methods), with an  
75 average first-order accuracy of 71.2 % ( $\pm$  1.0 %, 95 % CI, according to a 1up/2down  
76 adaptive procedure), first-order response time of 385 ms  $\pm$  8 ms, and difference of 13.1  $\pm$  1.7  
77 dots between the two arrays.

78 We then turned to second-order performance, quantifying metacognitive performance as the  
79 capacity to adapt confidence to first-order accuracy. Confidence was measured on a  
80 continuous scale quantifying the probability of being correct or incorrect (ranging from 0:  
81 “sure error” to 1: “sure correct”). A mixed effects logistic regression on first-order accuracy as  
82 a function of confidence and condition revealed an interaction between confidence and  
83 condition (model slope: odds ratios  $z = 2.90$ ,  $p = 0.004$ ; marginal  $R^2 = 0.69$ ), indicating that  
84 the slope between confidence and first-order accuracy was steeper in the active compared  
85 to observation condition (Figure 1B). This difference in metacognitive performance was  
86 present in all participants we tested, and also found when analyzing the data with tools  
87 derived from second-order signal detection theory (area under the type II receiver operating  
88 curve (AROC): active condition =  $0.92 \pm 0.02$ ; observation condition =  $0.90 \pm 0.03$ ; Wilcoxon  
89 sign rank test:  $V = 163$ ,  $p = 0.03$ , see SI). In addition, metacognitive performance was  
90 correlated between conditions ( $R^2 = 0.93$ ,  $p < 0.001$ ), suggesting partially overlapping  
91 mechanisms for monitoring committed and observed decisions. Of note, confidence per se  
92 did not differ across conditions ( $F(1,4772) = 0.01$ ,  $p = 0.98$ ).

93 To assess the contribution of decisional signals to metacognitive monitoring, we ran a linear  
94 mixed effects model on first-order response times as a function of confidence, accuracy, and  
95 condition. This model revealed a triple interaction ( $F(1,4742) = 6.05$ ,  $p = 0.014$ ),  
96 underscoring that in the active condition, response times for correct responses correlated  
97 negatively with confidence, and response times for errors correlated positively with  
98 confidence ( $F(1,26) = 23.70$ ,  $p < 0.001$ , Figure 1C). No main effect of confidence ( $F(1,29) =$   
99  $0.02$ ,  $p = 0.89$ ) nor interaction between confidence and accuracy ( $F(1,19) = 1.34$ ,  $p = 0.26$ )  
100 was observed in the observation condition (Figure 1C). Together, these results indicate that  
101 confidence was modulated by committed but not observed response times, and thus suggest  
102 the importance of decisional signals and potentially motor actions to build accurate  
103 confidence estimates.

104 To further elucidate the contribution of response times to confidence, we ran follow-up  
105 experiments including a third condition in which the first and second-order responses were  
106 reported simultaneously on a unique scale. We were able to replicate our finding of higher  
107 metacognitive performance between the active and observation condition, and found that  
108 metacognitive performance in the active condition was better than when first and second-  
109 order responses were provided simultaneously. This confirms that the readout of speeded  
110 motor actions associated with decision commitment serves subsequently as input to  
111 compute confidence. Lastly, to rule out the possibility that increases in metacognitive  
112 performance were due to confounding factors between the active and observed conditions  
113 (e.g., demand characteristics, visual saliency), we performed the same experiment under no-  
114 time pressure, and found no difference in metacognitive performance between committed  
115 and observed decisions (see SI). Altogether, these results validate our first pre-registered  
116 hypothesis that metacognitive performance is better for committed compared to observed  
117 speeded decisions, and suggest that action monitoring might play a role in this process.

118

119

- Figure 1 -

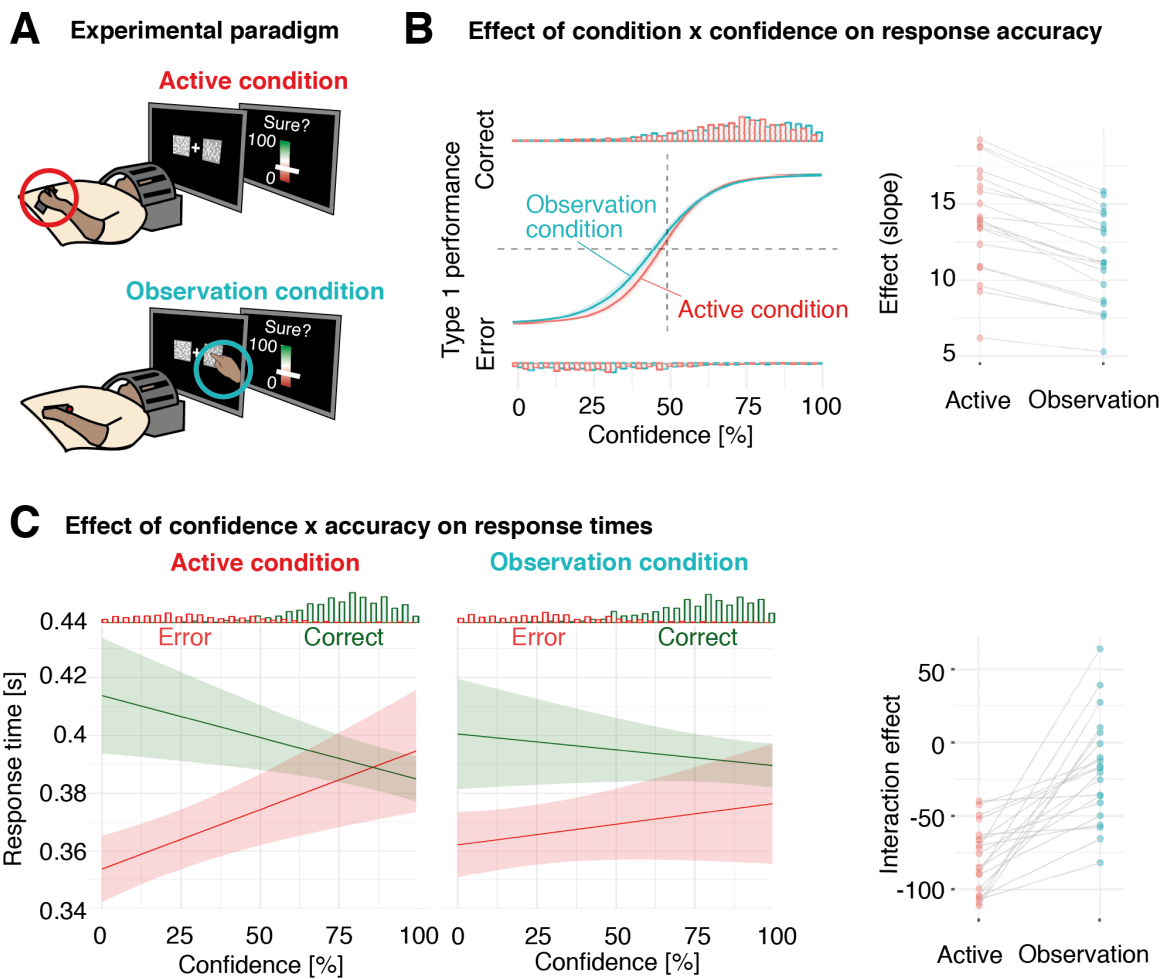

120

121 **Figure 1. Experimental paradigm and behavioral results.** (A) Experimental paradigm: a participant  
 122 lying in the fMRI bore equipped with an EEG cap performs (active condition in red) or observes  
 123 (observation condition in blue) the first-order task, and subsequently reports confidence in the  
 124 committed or observed decision using a visual analog scale. (B) Mixed effects logistic regression  
 125 between first-order accuracy and confidence in the active (red) and observation condition (blue). The  
 126 histograms represent the distributions of confidence for correct (top) and incorrect (bottom) first-order  
 127 responses. Right panel: Individual slopes of the mixed effects logistic regression indicating  
 128 metacognitive performance. (C) Mixed effects linear regression between first-order response times  
 129 and confidence for correct (in green) and incorrect trials (in red) in the active (left panel) and  
 130 observation condition (right panel). The histograms represent the distributions of response times and  
 131 confidence for correct and incorrect first-order responses. Rightmost panel: interaction term between  
 132 first-order accuracy and confidence for response times in the active compared to observation  
 133 condition. Shaded areas represent 95% confidence intervals.

134

135

136

137 **BOLD correlates of confidence**

138 We sought to find the brain regions co-activating with confidence by parametrically  
139 modulating a general linear model (GLM) with participants' confidence ratings, as well as  
140 response times and perceptual evidence (i.e., the difference in number of dots between the  
141 right and left side of the screen) as regressors of no interest (see methods). Because error  
142 monitoring and confidence are tightly related (Yeung & Summerfield, 2012), we deliberately  
143 analyzed the neural correlates of confidence without modeling first-order accuracy. Of note,  
144 the visual scale we used allowed participants to report their confidence estimate with a  
145 single and identical motor action with the left hand across conditions and trials, ruling out  
146 motor confounds when analyzing data (see methods). Widespread activity correlating both  
147 positively and negatively with confidence was found in the active and observation condition,  
148 in line with several other studies (Fleck et al., 2005; Fleming et al., 2012b; Baird et al., 2013;  
149 Heereman 2015; Hebart et al., 2016; Morales et al., 2018; Vaccaro & Fleming, 2018). A  
150 complete list of activations can be found in Supplementary Table 1. In addition, we found  
151 that the right precentral gyrus (contralateral to the hand reporting confidence), left insula,  
152 and bilateral pMFC were significantly more predictive of confidence in the active than in the  
153 observation condition (Supplementary table 2). We then defined the regions commonly  
154 activated by confidence in both conditions. A conjunction analysis revealed that the bilateral  
155 pMFC, left IPL, precentral gyrus, AI and IFG were negatively correlated with confidence  
156 (Figure 2B; Supplementary Table 3).

157



158

- Figure 2 -

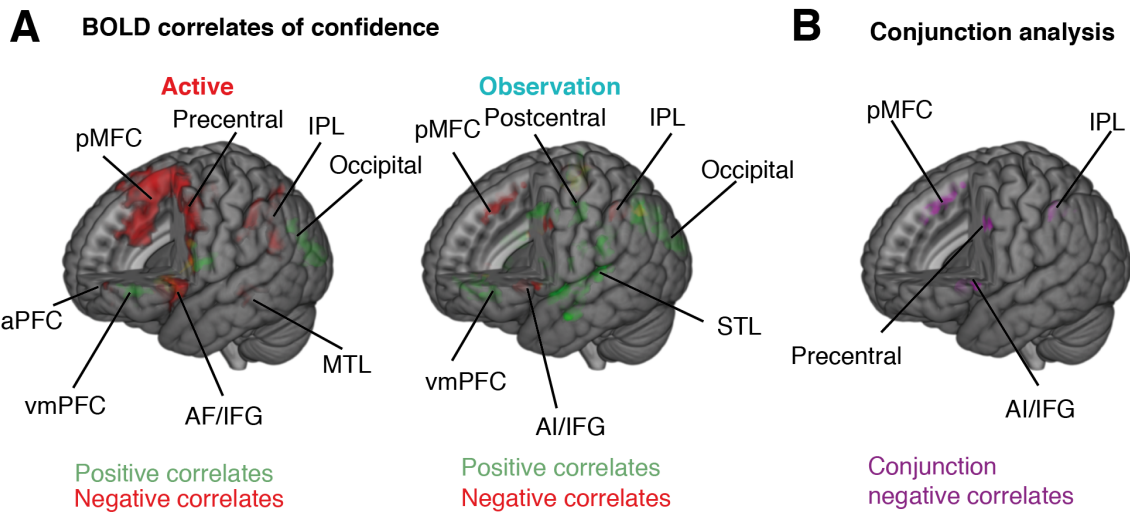

159

160 **Figure 2. BOLD correlates of confidence.** (A) Brain areas co-activated with positive (green) and negative (red)  
161 confidence values for the active (left) and observation (right) conditions. (B) Brain areas co-activated with  
162 negative confidence values in both conditions (conjunction analysis). All displayed BOLD activations are FWE-  
163 corrected ( $p < 0.05$ ) at the cluster-level with a threshold at  $p < 0.001$ . Labels: anterior insula (AI), anterior prefrontal  
164 cortex (aPFC), Posterior medial frontal cortex (pMFC), inferior frontal gyrus (IFG), inferior parietal lobule (IPL),  
165 medial temporal lobe (MTL), superior temporal lobe (STL), ventromedial prefrontal cortex (vmPFC). Not all brain  
166 regions are labeled (see Supplementary Tables 1-3).

167

168 **ERP correlates of confidence** To further isolate the neural correlates of confidence for  
169 committed and observed decisions, we identified which regions co-activated with EEG  
170 correlates of confidence occurring exclusively within five hundred milliseconds after the first-  
171 order response (i.e., post-decisional processes). We first modeled the EEG amplitude time-  
172 locked to the first-order response as a function of confidence using mixed effects linear  
173 regression, with first-order response times and perceptual evidence as covariates of no  
174 interest (see methods). In the active condition, we found that EEG amplitude correlated with  
175 confidence starting 68 ms following the first-order response over centro-parietal electrodes,  
176 resembling a centro-parietal positivity (CPP; Figure 3A, top left; O'Connell et al., 2012).  
177 Another correlate of confidence was found 88 ms post-response over frontoparietal  
178 electrodes, akin to an error-related negativity (ERN; Figure 3A, bottom left; Falkenstein et al.,  
179 1991, Gehring et al., 1993). In the observation condition, correlates of confidence were  
180 found on the same two electrodes with similar topography (correlation between frontocentral

181 cluster in the active and observation conditions:  $\rho = 0.88$ ) but not before 200 ms post-  
182 response (Figure 3A, right).

183

#### 184 **Common and distinct BOLD correlates of EEG decoded confidence**

185 The brain regions corresponding to the ERP correlates of confidence were identified by  
186 modeling the BOLD signal with EEG-based single-trial predictions of confidence. Confidence  
187 predictions at each time point were derived from a linear regressor taking the EEG  
188 independent components activation profiles as low-dimensional variables ( $N=8 \pm 3$  for each  
189 participant, see methods). Leave-one-out performance was significant at the group level  
190 (non-parametric permutation test, corrected  $p < 0.05$ ) with a peak decoding performance  
191 achieved 96 ms and 356 ms following committed and observed responses (Figure 3B).

192 To dissociate early correlates of potentially “all-or-none”, binary error detection from fine-  
193 grained second-order confidence estimates described as occurring 200 ms after response  
194 (Boldt and Yeung, 2015), we selected two time points corresponding to local peaks in the  
195 cross-validated decoding performance within an early (50 - 200 ms post response) and late  
196 (200 - 450 ms) temporal windows (see Methods). The latency of the early peaks was  $108 \pm$   
197  $22\text{ms}$  in the active condition. There was no significant decoding in the early time window in  
198 the observation condition. Late peak latencies were  $321 \pm 31$  ms in the active and  $353 \pm 27$   
199 ms in the observation condition, with no significant difference between condition ( $t(19) = -$   
200  $1.49$ ,  $p = 0.15$ ). Based on these two time-points, we re-trained one regressor per condition  
201 and peak on all available epochs and used the resulting single-trial predictions as a  
202 parametric regressor to model the BOLD signal, along with first-order response times and  
203 perceptual evidence as covariates of no interest. By using EEG as a time-resolving proxy to  
204 BOLD signal (Britz et al., 2010), we sought to investigate the anatomical correlates of  
205 confidence at specific timings, with the aim of disentangling BOLD signal associated with pre  
206 and post-decisional processes (Gherman & Philiastides 2018).

207

- Figure 3 -

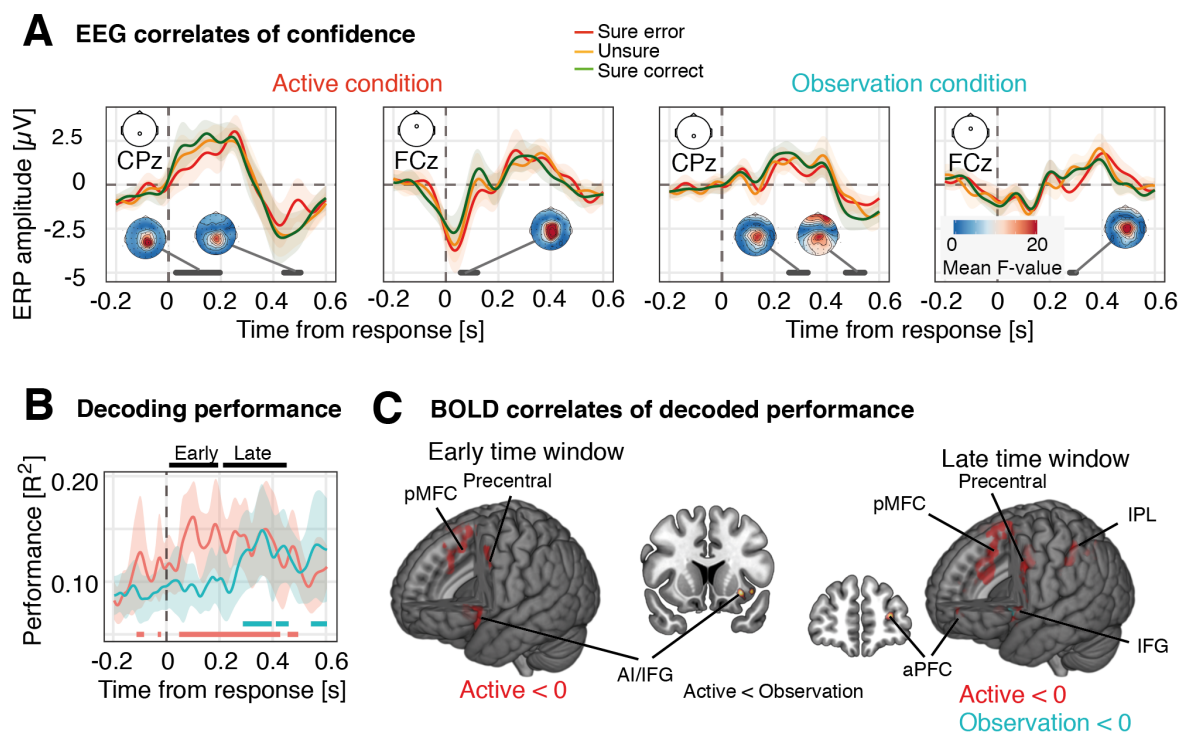

208

209

210

211

212

213

214

215

216

217

218

219

220

221

222

223

224

225

226

**Figure 3. EEG-informed correlates of confidence.** (A) ERPs time-locked to the first-order response are shown for the active condition (left panels) and observation condition (right panels) for the CPz and FCz sensors. For illustrative purposes, epochs were binned according to three levels of reported confidence: sure error (0 - 33% confidence), unsure (34 - 66% confidence) and sure correct (67 - 100% confidence), although statistics were computed with raw confidence values using mixed effects linear regression. The shaded areas represent 95%-CI. Regions of significance ( $p < 0.05$ , FWE corrected) are depicted with a gray line, along with topographic maps of the corresponding F values. (B) Leave-one-out decoding performance over time. The plot shows the amount of variance of the reported confidence explained by the decoder ( $R^2$ ) over time in the active (red trace) and the observation condition (blue trace). The shaded areas represent 95%-CI, and the horizontal dashed lines the chance level ( $p < 0.05$ , computed via non-parametric permutation tests corrected for multiple comparisons). For each participant and condition, the output of the best decoder within an early and late time window was retrained on the whole dataset and used as a parametric regressor to model the BOLD signal. (C) Brain areas co-activated with low decoded-confidence values in the early (left) and late time window (right). All displayed BOLD activations are FWE-corrected ( $p < 0.05$ ) at the cluster-level with a threshold at  $p < 0.001$ . Labels: Posterior medial frontal cortex (pMFC), inferior parietal lobule (IPL), anterior insula (AI), inferior frontal gyrus (IFG) and anterior prefrontal cortex (aPFC). Not all brain regions are labeled (see Supplementary Table 4). The coronal view shows significant differences between the active and the observation condition for the labelled region (AI for the early time window and aPFC for the late time window).

227

228 The regions co-activating with *decoded* confidence in the early time window included the

229 bilateral pMFC, the left IFG, AI and MFG (Figure 3C, left). For the late time window (Figure

230 3C, right), coactivations with low decoded-confidence were found in the bilateral pMFC and

231 IFG, the left precentral gyrus, IPL, AI, MFG and aPFC for the active condition, and in the left

232 IFG for the observation conditions (Supplementary Table 4). The left IFG was thus

233 commonly activated by low decoded-confidence in both conditions. Differences between co-

234 activations in the active and observation condition were found in the anterior insula (AI) in  
235 the early time window and in the aPFC in the late time window (Figure 3C; Supplementary  
236 Table 4).

237

## 238 **Behavioral modeling**

239 In view of obtaining a mechanistic understanding of the way decisional and post-decisional  
240 evidence contribute to confidence, we derived confidence in committed and observed  
241 decisions using a race accumulator model, considered to be biologically plausible  
242 representations of evidence accumulation in the brain (Bogacz et al., 2006; Gold and  
243 Shadlen, 2007). Such models assume that ideal observers commit to a first-order decision  
244 (D; Figure 4A) once one of two competing evidence accumulation processes (here,  
245 corresponding to evidence for the left or right choice) reaches a decision.

246 We first fitted five parameters (i.e., drift, bound, non-decision time, non-decision time  
247 variability and starting point variability, see methods) to first-order choice accuracy and  
248 response times recorded for each participant during the active condition. With these  
249 parameters, we simulated pairs of competing evidence accumulation trajectories leading to  
250 first-order choices and response times. We then derived confidence based on a mapping of  
251 the state of evidence of the winning accumulator, following recent findings that confidence is  
252 based solely on evidence supporting the decision (Peters et al. 2018; Zylberberg et al.,  
253 2012). To account for changes-of-mind, we sampled accumulated evidence after a post-  
254 decisional period (tpd in Figure 4A; Peskac and Busemeyer, 2010; Van Den Berg et al.,  
255 2016) corresponding to the average peak decoding accuracy found with EEG (see previous  
256 section). The sampled evidence was mapped to the range of confidence ratings using a  
257 sigmoidal transformation with two additional free parameters controlling for bias and  
258 sensitivity (see methods).

259 For the observation condition, we assumed a similar evidence accumulation process, except  
260 that choice and response times were independent from the evidence accumulation process,  
261 as in our paradigm. Since first-order behavior in the observation condition remained latent by  
262 design, we used the parameters fitted for the active condition to simulate a second dataset  
263 of pairs of competing evidence accumulation trajectories. We then mapped confidence from  
264 a readout of the accumulator with highest evidence after the post-decisional period, but time-  
265 locked to shuffled observed decisions (oD in Figure 4A) and response times, as in our  
266 paradigm. When observed decisions were incongruent with covert decisions, we inverted the  
267 simulated confidence ratings. This model fitted confidence data better than an alternative  
268 model for which participants did not make covert decisions and simply readout confidence  
269 from the state of evidence of the accumulator corresponding to the computer's choice (log-  
270 likelihood:  $-2.13 \pm 6.32$  versus  $-2.91 \pm 6.65$ , Wilcoxon sign rank test,  $p = 0.019$ ).

271 Across participants, our model fitted confidence ratings well (active condition:  $R^2 = 0.71 \pm$   
272  $0.30$ ; observation:  $R^2 = 0.65 \pm 0.40$ ; Figure 4B), suggesting that it represents a plausible  
273 mechanism of confidence build-up for speeded decisions. Most importantly, the confidence  
274 model for the active condition predicted better metacognitive accuracy than the observation  
275 model, consistent with our experimental data (Figure 4C). As in the behavioral analysis, we  
276 ran a mixed effects logistic regression on first-order accuracy as a function of confidence  
277 and condition, which revealed an interaction between confidence and condition (odds ratios  
278  $z = -4.58$ ,  $p < 0.001$ ), indicating that the slope between confidence and first-order accuracy  
279 was steeper in the active compared to observation condition. Area under the type II receiver  
280 operating curve (AROC) was also higher for the active condition ( $0.95 \pm 0.02$  vs.  $0.93 \pm 0.03$ ,  
281 Wilcoxon sign rank test,  $V = 197$ ,  $p < 0.001$ ). Of note, these differences were not explained  
282 by differences in the goodness-of-fit across subjects ( $R=0.13$ ;  $p=0.59$ ). We could thus  
283 reproduce the lower metacognitive performance found in the observation condition only by  
284 detaching the decision process from the evidence accumulation process leading to  
285 confidence.

286

- Figure 4 -

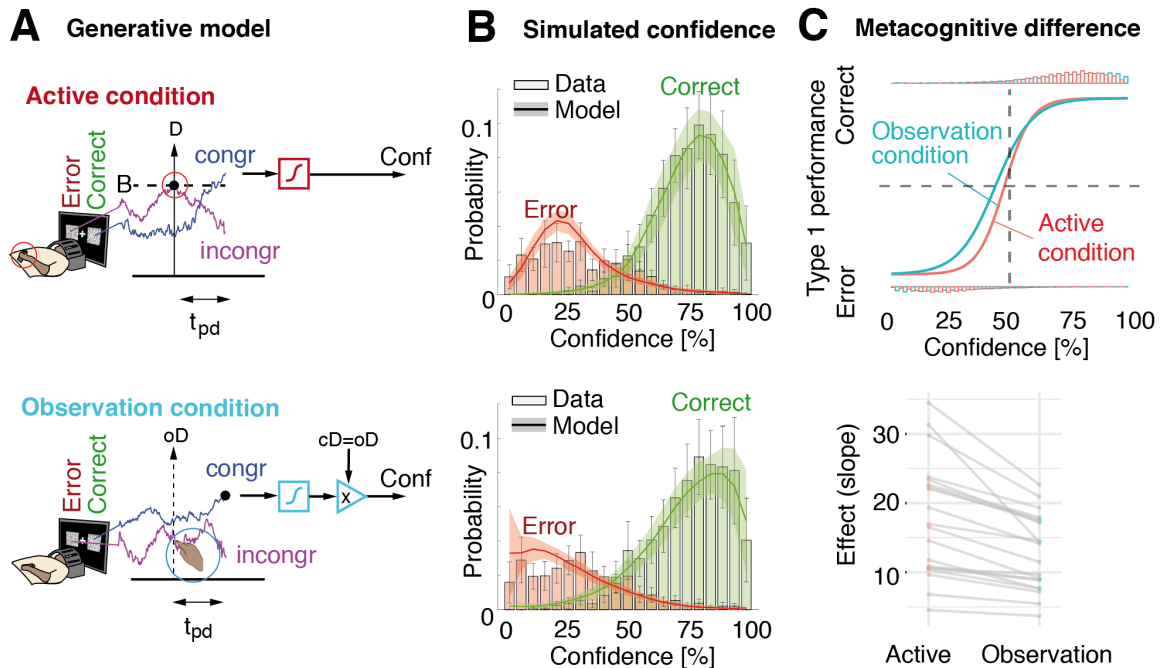

287

288 **Figure 4. Race accumulator model for confidence.** (A) Upper plot: an example trial for which the participant  
 289 made a first-order error. The violet and blue traces represent accumulators that are incongruent and congruent  
 290 with a correct response, respectively. A committed first-order decision (D) is taken when the winning accumulator  
 291 hits the decision bound (dashed horizontal line). Here, the violet trace wins, producing a first-order error.  
 292 Confidence is assumed to be based on the difference between both accumulators at the end of the post-  
 293 decisional period. Similarly, confidence in the observed response is read-out from the difference between both  
 294 accumulators at the end of the post-decisional period. In both plots, the sigmoid (square box) constrains the  
 295 result to the [0,100] % interval.  $T_{nd}$  is the non-decisional time,  $t_d$  the time taken for the winning accumulator  
 296 to reach the decision bound B and  $t_{pd}$  the post-decisional time. (B) Histogram of the confidence ratings obtained  
 297 during the experiments, compared to the model simulations (thick line) for error (red) and correct (green). Upper  
 298 plot for the active condition (second-order model), lower plot for the observation condition (non-decisional model).  
 299 Error bars and shaded area represent 95% confidence intervals across subjects. (C) Top panel: Mixed logistic  
 300 regression between simulated first-order accuracy and simulated confidence, in the active (red) and observation  
 301 condition (blue). Bottom panel: Individual slopes of the mixed regression model indicating metacognitive  
 302 performance, see Figure 1B for the actual behavioral results.

303

## 304 **Discussion**

305 The present study evaluated the contribution of decisional signals to metacognition by  
306 comparing and modeling confidence judgments for committed and observed decisions, and  
307 identifying the neural correlates of confidence with high spatiotemporal resolution. A group of  
308 20 healthy volunteers was asked to perform or observe a perceptual task, and then indicate  
309 their confidence regarding the accuracy of the committed or observed decisions.

### 310 **Better metacognitive performance for committed decisions**

311 Participants were able to adjust confidence to the accuracy of their own perceptual  
312 decisions, and to the accuracy of decisions they observed. Yet, consistent with our pre-  
313 registered predictions, committed decisions were associated with a slight but consistent  
314 increase in metacognitive performance compared to observed decisions, which supports  
315 decision commitment as an additional input for confidence. Of note, this effect could not be  
316 explained by differences in terms of perceptual evidence or first-order performance across  
317 conditions, which were identical by design (see Methods). A follow-up experiment revealed  
318 equivalent metacognitive performance for committed and observed decisions when  
319 participants were given more time to perform the first-order task. This indicates that the  
320 metacognitive advantage we describe occurred in speeded tasks in which errors are  
321 immediately recognized as such (Charles et al., 2013). By showing the specificity of  
322 metacognitive improvement for committed decisions under speeded conditions, this follow-  
323 up experiment also undermines the possibility that our effect stems from experimental  
324 confounds between the active and observation conditions (e.g., demand characteristics,  
325 visual saliency), as such confound would likely pertain both to speeded and non-speeded  
326 conditions. Last, we found that metacognitive performance in the active condition was better  
327 than another condition involving simultaneous first and second-order responses, in which by  
328 definition confidence could not be informed by a previous committed decision. This brings  
329 another line of evidence that action monitoring plays a role for confidence.

330 We then turned to computational modeling to shed light on the role of decisional signals for  
331 decision monitoring (Kepecs et al., 2008, Kiani et al., 2009, Pleskac et al., 2010, Maniscalco  
332 & Lau, 2016). One biologically plausible (computational account of decision making, called  
333 race accumulator model (Bogacz et al., 2006; Kiani et al., 2014), assumes that ideal  
334 observers commit to a first-order decision (here, the right or left side of the screen containing  
335 more dots) once one of two competing evidence accumulation processes (for one or the  
336 other choice) reaches a decision boundary. We extended these models, assuming a  
337 continuation of evidence accumulation after the first-order decision (Van Den Berg et al.,  
338 2016). Through this procedure, we found that the path of second-order evidence  
339 accumulation in the active condition was constrained by the first-order decision boundary,  
340 which translated into confidence estimates with lower variance compared to observed  
341 responses which impose no constraint on evidence accumulation ( $7.24 \pm 0.11$  vs  $9.04 \pm$   
342  $0.16$ , Wilcoxon signed rank test,  $V = 8$ ,  $p < 0.001$ ). This prediction was verified a posteriori in  
343 our behavioral data, as we found higher variance for confidence ratings in the observation  
344 vs. active condition ( $6.71 \% \pm 0.92$  vs.  $7.33 \pm 1.15$ , Wilcoxon signed rank test,  $V = 45$ ,  $p =$   
345  $0.024$ ).

346 The notion that committing to (but not observing) first-order decisions sharpens confidence  
347 estimates is corroborated by studies showing that metacognitive performance increases  
348 when response times are taken into account to compute confidence (Siedlecka, Paulewicz,  
349 & Wierchoń, 2016), and decreases in case motor actions are irrelevant to the task at play  
350 (Kvam et al., 2015), or when the task-relevant motor action is disrupted by transcranial  
351 magnetic stimulation over premotor cortex (Fleming et al., 2015). The role of motor signals  
352 for metacognition is also supported by recent results indicating that confidence increases in  
353 presence of sub-threshold motor activity prior to first-order responses (Gadjos et al., 2018);  
354 and that alpha desynchronization over the sensorimotor cortex controlling the hand  
355 performing that action correlate with confidence (Faivre et al., 2018). Together, these  
356 empirical results suggest that confidence is not solely derived from the quality of perceptual



357 evidence, but involves the perception-action cycle. By comparing committed and observed  
358 decisions in a controlled way, we could test a direct prediction derived from these studies,  
359 and document its neural and computational mechanisms.

360

### 361 **Neural correlates of confidence in committed and observed decisions**

362 After assessing the contribution of decision commitment to confidence at the behavioral  
363 level, we identified the brain regions at play for monitoring committed and observed  
364 decisions by parametrically modulating the BOLD signal by confidence estimates. Besides  
365 brain regions activated independently across conditions (Supplementary table 1), we found  
366 that the right precentral gyrus (contralateral to the hand reporting confidence), left anterior  
367 insula and bilateral pMFC were significantly more predictive of confidence in the active than  
368 in the observation condition (Supplementary table 2). The involvement of such motor and  
369 error detection regions (Carter et al., 1998; Bonini et al., 2014; Bastin et al., 2017), together  
370 with our behavioral and modeling results support the notion that action monitoring serves as  
371 input for confidence. This is corroborated by behavioral results from a follow-up experiment,  
372 showing that metacognitive performance was better in the active condition compared to a  
373 condition in which the first and second-order responses were reported simultaneously on a  
374 unique scale.

375 In search for hemodynamic correlates of confidence independent from action commitment,  
376 we identified the brain regions conjunctively related to confidence in the active and  
377 observation conditions as the pMFC, insula, IFG, IPL and precentral gyrus (See  
378 Supplementary Table 3). This is corroborated by previous results by Heereman and  
379 colleagues (2015), who found the pMFC, insula and IFG to be negatively correlated with  
380 confidence during motion and color discrimination tasks, as well as Morales and colleagues  
381 (2018), who found the pMFC to be negatively correlated for confidence in perceptual and  
382 memory tasks. In addition, IPL activations (Hayes et al., 2011; Kim & Cabeza, 2007, 2009;

383 Moritz et al., 2006) and gray matter thickness (Filevich et al., 2018) were shown to correlate  
384 negatively with confidence. These regions could represent a substrate for the computation of  
385 confidence, stripped from decisional and error correction processes.

386

### 387 **Timing of confidence-related brain activations**

388 Due to the low temporal resolution of the BOLD signal, it is worth considering that the above-  
389 mentioned regions may be contaminated by prerequisites of confidence computation (e.g.,  
390 quality of numerosity representation, alertness), as well as its by-products (e.g., the act of  
391 reporting confidence on the scale). To further isolate the neural correlates at play when  
392 computing confidence for committed and observed decisions and pruning out some of the  
393 prerequisites and by-products of confidence, we constrained our search to neural events  
394 occurring in the vicinity of the committed/observed first-order response by fusing EEG and  
395 fMRI data (Debener et al., 2005; Gherman & Philiastides, 2018).

396 In line with our pre-registered hypothesis, we found early correlates of confidence for  
397 committed but not for observed decisions in fronto-central EEG activity resembling the error-  
398 related negativity (ERN) involved in error detection (Boldt & Yeung, 2015) and in fronto-  
399 parietal activity resembling the centro-parietal positivity (CPP) involved in evidence  
400 accumulation (O'Connell et al., 2012). To address the possibility that early correlates of  
401 confidence in observed decisions do not appear in event-related potentials but involve  
402 multivariate electrophysiological patterns, we built a decoder of confidence based on whole-  
403 scalp EEG. Coherently with the univariate results described above, our decoder could  
404 explain confidence better than chance level in the time vicinity of committed decisions (108  
405 ms post-response), while significant decoding performance was only attained 353 ms after  
406 observed decisions. The absence of early correlates of confidence in the observation  
407 condition was expected as participants could not possibly assess first-order accuracy before  
408 perceiving the observed decision (Holroyd & Coles 2002, Van Schie et al., 2004; Iturrate et

409 al., 2015). Of note, decoding performance in the active condition plateaued after the first  
410 peak and dropped after around 400 ms, indicating that ongoing processes leading to  
411 confidence may be sustained in time. Thus, the computation of confidence may unfold in two  
412 waves, an early one specific to the the monitoring of committed decisions, and a later one for  
413 computing confidence *per se*. One possibility is that the early correlate for committed  
414 decisions relates to an “all-or-none” automatic error detection system (Charles et al., 2013,  
415 although see Vocat et al., 2011, Pereira et al., 2017), while the late correlate underlies a  
416 fine-grained estimation of second-order signals (Boldt & Yeung, 2015).

417 We finally examined the properties of early and late correlates of confidence by assessing  
418 their BOLD covariates. For that, we parametrically modulated the BOLD signal using the  
419 output of a decoding model of confidence based on whole-scalp EEG, hereby obtaining a  
420 time-resolved description of fMRI data (Gherman & Philiastides, 2018). In the active  
421 condition, we found that the pMFC, IFG, MFG and insula were co-activated both during the  
422 early and late decoding window. These regions are likely to relate to early error processing  
423 based on the monitoring of errors/conflicts surrounding the first-order response (Dehaene et  
424 al., 1994, Carter et al., 1998, Bonini et al., 2014, Bastin et al., 2017, Ullsperger et al., 2014  
425 for a review). Furthermore, Murphy and colleagues showed that similar error-related  
426 feedback signals from the pMFC inform metacognitive judgments through the modulation of  
427 parietal activity involved in evidence accumulation (Murphy et al., 2015). Other regions  
428 including the IPL, precentral cortex and aPFC were found specifically in the late decoding  
429 window, which hints to their involvement in late processes at play for the computation of  
430 graded confidence estimates. In the observation condition, the only region coactivated with  
431 late electrophysiological correlates of confidence was the left IFG, adjacent to the cluster we  
432 found in the active condition. This suggests the role of left IFG operating similarly around  
433 300 ms whether a decision is committed or observed. Of note, the quest for domain-general  
434 mechanisms of confidence (Faivre et al., 2018, Rouault et al., 2018) is hindered by the fact  
435 that our paradigm alternated short blocks of active and observation conditions, which could

436 potentially inflate correlations in confidence due to confidence leaks across trials (Rahnev et  
437 al., 2015).

438 By contrast to decision-independent activations in the IFG, the aPFC – commonly referred to  
439 as a key region for confidence (Fleming et al., 2010, 2012, Morales et al., 2018, for review  
440 see Grimaldi et al., 2015)– was involved in monitoring committed decisions only. The fact  
441 that activity in the insula and aPFC were not related to confidence in observed decisions  
442 reveals that these regions may underlie a putative role in linking first-order decisional signals  
443 allowing early error detection to inform fine-graded confidence estimates derived from the  
444 quality of perceptual evidence (Fleming et al., 2018). Beyond error detection, the aPFC  
445 could operate by linking other sources of information to inform confidence, including the  
446 history of confidence estimates over past trials (Shekhar et al. 2018). Although this claim  
447 deserves further investigations, it extends a recent proposal by Bang & Fleming (2018)  
448 arguing that aPFC is involved in reporting rather than computing confidence estimates per-  
449 se.

450

## 451 **Conclusion**

452 We combined psychophysics, multimodal brain imaging, and computational modeling to  
453 unravel the mechanisms at play when monitoring the quality of decisions we make, in  
454 comparison to equivalent decisions we observe. Our behavioral and modeling results  
455 indicate that committing to a decision leads to increases in metacognitive performance,  
456 presumably due to the constraint of evidence accumulation by first-order decisions. By  
457 focusing the analysis of neural signals on processes independent from decision-making, we  
458 isolated the IFG as a key region contributing to confidence in both committed and observed  
459 decisions. We further specified the functional role of the IFG, distinct from a set of regions  
460 involved in error processing, and from the insula and aPFC which could potentially inform  
461 confidence estimates with the output of such error processing.

## 462 References

- 463 Baird, B., Smallwood, J., Gorgolewski, K. J. & Margulies, D. S. Medial and lateral networks in  
464 anterior prefrontal cortex support metacognitive ability for memory and perception. *J.*  
465 *Neurosci.* **33**:16657–16665 (2013).
- 466 Bang, D. & Fleming, S. M. Distinct encoding of decision confidence in human medial prefrontal  
467 cortex. *Proc. Natl. Acad. Sci.* **115**:6082–6087 (2018).
- 468 Bogacz, R., Brown, E., Moehlis, J., Holmes, P. & Cohen, J.D. The physics of optimal decision  
469 making: A formal analysis of models of performance in two-alternative forced-choice tasks.  
470 *Psychol. Rev.* **113**:700–765 (2006).
- 471 Boldt, A. & Yeung, N. Shared neural markers of decision confidence and error detection. *J.*  
472 *Neurosci.* **35**:3478–3484 (2015).
- 473 Bonini, F., Burle, B., Liégeois-Chauvel, C., Régis, J., Chauvel, P., Vidal, F. Action monitoring  
474 and medial frontal cortex: Leading role of supplementary motor area. *Science* **343**:888–91  
475 (2014).
- 476 Britz, J., Van De Ville, D., & Michel, C. M. BOLD correlates of EEG topography reveal rapid  
477 resting-state network dynamics. *Neuroimage* **52**(4), 1162-1170 (2010).
- 478 Carter, C. S., Braver, T. S., Barch, D. M., Botvinick, M. M., Noll, D. & Cohen, J. D. Anterior  
479 cingulate cortex, error detection, and the online monitoring of performance. *Science*  
480 **280**:747 (1998).
- 481 Charles, L., Opstal, F., Van Marti, S. & Dehaene, S. Distinct brain mechanisms for conscious  
482 versus subliminal error detection. *Neuroimage* **73**:80–94 (2013).
- 483 Debener, S., et al. Trial-by-trial coupling of concurrent electroencephalogram and functional  
484 magnetic resonance imaging identifies the dynamics of performance monitoring. *J.*  
485 *Neurosci.* **25**(50):11730-11737 (2005).
- 486 Dehaene, S., Posner, M. I. & Tucker, D. M. Localization of a neural system for error detection  
487 and compensation. *Psychol. Sci.* **5**:303–305 (1994).
- 488 Faivre, N., Filevich, E., Solovey, G., Kühn, S. & Blanke, O. Behavioural, modeling, and  
489 electrophysiological evidence for supramodality in human metacognition. *J. Neurosci.*  
490 **38**:0322-17 (2018).
- 491 Falkenstein, M., Hohnsbein, J., Hoormann, J., Blanke, L. Effects of crossmodal divided attention  
492 on late ERP components. II. Error processing in choice reaction tasks. *Electroencephalogr.*  
493 *Clin. Neurophysiol.* **78**:447–455 (1991).
- 494 Filevich, E., Forlim, C. G., Fehrman, C., Forster, C., Paulus, M., Shing, Y. L., & Kuehn, S. I know  
495 that I don't know: Structural and functional connectivity underlying meta-ignorance in pre-  
496 schoolers. Preprint at <https://www.biorxiv.org/content/early/2018/10/22/450346> (2018).
- 497 Fleck, M. S., Daselaar, S. M., Dobbins, I. G., & Cabeza, R. Role of prefrontal and anterior  
498 cingulate regions in decision-making processes shared by memory and nonmemory tasks.  
499 *Cereb. Cortex* **16**(11):1623-1630 (2005).
- 500 Fleming, S.M., Weil, R.S., Nagy, Z., Dolan, R.J. & Rees, G. Relating introspective accuracy to  
501 individual differences in brain structure. *Science* **329**:1541–1543 (2010).

- 502 Fleming, S.M., Dolan, R.J. The neural basis of metacognition. *Philos. Trans. R. Soc. B. Biol. Sci.*  
503 **367**:1338–1349 (2012).
- 504 Fleming, S.M., Huijgen, J & Dolan, R.J. Prefrontal contributions to metacognition in perceptual  
505 decision making. *J. Neurosci.* **32**:6117–6125 (2012).
- 506 Fleming, S. M., Maniscalco, B., Ko, Y., Amendi, N., Ro, T. & Lau, H. Action-specific disruption of  
507 perceptual confidence. *Psychol. Sci.* **26**:89–98 (2015).
- 508 Fleming, S. M., & Daw, N. D. Self-evaluation of decision-making: A general Bayesian framework  
509 for metacognitive computation. *Psychological review*, **124**(1):91 (2017).
- 510 Fleming, S. M., Putten, E. J., & Daw, N. D. Neural mediators of changes of mind about  
511 perceptual decisions. *Nature. neuroscience.* **21**:617-624 (2018).
- 512 Gajdos, T., Fleming, S., Garcia, M. S., Weindel, G. & Davranche, K. Revealing subthreshold  
513 motor contributions to perceptual confidence. Preprint at  
514 <https://www.biorxiv.org/content/early/2018/05/25/330605> (2018)
- 515 Gehring, W., Goss, B. & Coles, M. A neural system for error detection and compensation.  
516 *Psychol. Sci.* **4**:385–390 (1993).
- 517 Gherman, S., Philiastides, M. G. Human VMPFC encodes early signatures of confidence in  
518 perceptual decisions. *Elife* **7**:1–28 (2018).
- 519 Grimaldi, P., Lau, H. & Basso, M. A. There are things that we know that we know, and there are  
520 things that we do not know we do not know: Confidence in decision-making. *Neurosci.*  
521 *Biobehav. Rev.* **55**:88-97 (2015)
- 522 Gold, J. I. & Shadlen, M. N. The neural basis of decision making. *Annu. Rev. Neurosci.* **30**:535–  
523 574 (2007).
- 524 Hayes, S. M., Buchler, N., Stokes, J., Kragel, J. & Cabeza, R. Neural correlates of confidence  
525 during item recognition and source memory retrieval: evidence for both dual-process and  
526 strength memory theories. *Journal of Cognitive Neuroscience* **23**(12):3959-3971 (2011).
- 527 Hebart, M. N., Schriever, Y., Donner, T. H. & Haynes, J. D. The relationship between perceptual  
528 decision variables and confidence in the human brain. *Cereb. Cortex* **26**:118–130 (2016).
- 529 Heereman, J., Walter, H. & Heekeren, H. R. A task-independent neural representation of  
530 subjective certainty in visual perception. *Front. Hum. Neurosci.* **9**:1–12 (2015).
- 531 Holroyd, C. B. & Coles, M. G. H. The neural basis of human error processing: Reinforcement  
532 learning, dopamine, and the error-related negativity. *Psychol. Rev.* **109**:679–709 (2002).
- 533 Iturrate, I., Chavarriaga, R., Montesano, L., Minguéz, J. & Millán, J.d.R. Teaching brain-machine  
534 interfaces as an alternative paradigm to neuroprosthetics control. *Sci. Rep.* **5**:13893  
535 (2015).
- 536 Kepecs, A., Uchida, N., Zariwala, H. A. & Mainen, Z. F. Neural correlates, computation and  
537 behavioural impact of decision confidence. *Nature* **455**:227–231 (2008).
- 538 Kiani, R. & Shadlen, M. N. Representation of confidence associated with a decision by neurons  
539 in the parietal cortex. *Science* **324**:759–764 (2009).
- 540 Kiani, R., Corthell, L., & Shadlen, M. N. Choice certainty is informed by both evidence and  
541 decision time. *Neuron* **84**(6):1329-1342 (2014).

- 542 Kim, H. & Cabeza, R. Trusting our memories: Dissociating the neural correlates of confidence in  
543 veridical versus illusory memories. *J. Neurosci.* **27**(45):12190-12197 (2007).
- 544 Kim, H. & Cabeza, R. Common and specific brain regions in high-versus low-confidence  
545 recognition memory. *Brain research* **1282**:103-113 (2009).
- 546 Koriat, A. Metacognition and consciousness In: *The Cambridge Handbook of Consciousness*,  
547 289–326 (2006).
- 548 Kvam, P. D., Pleskac, T. J., Yu, S. & Busemeyer, J. R. Interference effects of choice on  
549 confidence: Quantum characteristics of evidence accumulation. *Proc. Natl. Acad. Sci.*  
550 **112**:10645–10650 (2015).
- 551 Maniscalco, B. & Lau, H. The signal processing architecture underlying subjective reports of  
552 sensory awareness. *Neurosci. Conscious.* **1**:1–17 (2016).
- 553 Morales, J., Lau, H. & Fleming, S.M. Domain-general and domain-specific patterns of activity  
554 supporting metacognition in human prefrontal cortex. *J. Neurosci.* **38**:2360–17 (2018).
- 555 Moritz, S., Gläscher, J., Sommer, T., Büchel, C. & Braus, D. F. Neural correlates of memory  
556 confidence. *Neuroimage* **33**(4):1188-1193 (2006).
- 557 Murphy, P. R., Robertson, I. H., Harty, S. & O'Connell, R. G. Neural evidence accumulation  
558 persists after choice to inform metacognitive judgments. *Elife* **4**:1–23 (2015).
- 559 O'Connell, R. G., Dockree, P. M. & Kelly, S.P. A supramodal accumulation-to-bound signal that  
560 determines perceptual decisions in humans. *Nat. Neurosci.* **15**(12):1729-35 (2012)
- 561 Pereira, M., Sobolewski, A. & Millán, J.d.R. Action monitoring cortical activity coupled to sub-  
562 movements. *eNeuro* **4**:1–12 (2017).
- 563 Peters, M. A. K. et al. Perceptual confidence neglects decision-incongruent evidence in the  
564 brain. *Nat. Hum. Behav.* **1**:1–8 (2018).
- 565 Pleskac, T. J. & Busemeyer, J. R. Two-stage dynamic signal detection: A theory of choice,  
566 decision time, and confidence. *Psychol. Rev.* **117**:864 (2010).
- 567 Pouget, A., Drugowitsch & J., Kepecs, A. Confidence and certainty: Distinct probabilistic  
568 quantities for different goals. *Nat. Neurosci.* **19**:366–374 (2016).
- 569 Rahnev, D., Koizumi, A., McCurdy, L.Y., D'Esposito, M., Lau, H. Confidence Leak in Perceptual  
570 Decision Making. *Psychol Sci* **26**:1664–1680 (2015).
- 571 Rahnev, D., Nee, D. E., Riddle, J., Larson, A.S. & D'Esposito, M. Causal evidence for frontal  
572 cortex organization for perceptual decision making. *Proc. Natl. Acad. Sci.* **113**(21):6059-  
573 6064 (2016).
- 574 Rouault, M., McWilliams, A., Allen, M. & Fleming, S. M. Human metacognition across domains:  
575 insights from individual differences and neuroimaging. *Personality Neuroscience* **1**(e17):1-  
576 13 (2018).
- 577 Shekhar, M., Rahnev, D. Distinguishing the Roles of Dorsolateral and Anterior PFC in Visual  
578 Metacognition. *J. Neurosci.* **38**:5078–5087 (2018).
- 579 Siedlecka, M., Paulewicz, B. & Wierzchoń, M. But I was so sure! Metacognitive judgments are  
580 less accurate given prospectively than retrospectively. *Front. Psychol.* **7**:1–8 (2016).

- 581 Ullsperger, M., Danielmeier, C. & Jocham, G. Neurophysiology of performance monitoring and  
582 adaptive behavior. *Physiol. Rev.* **94**:35–79 (2014).
- 583 Vaccaro, A.G., Fleming, S.M. Thinking about thinking: A coordinate-based meta-analysis of  
584 neuroimaging studies of metacognitive judgements. *Brain Neurosci Adv* **2**:1-14 (2018).
- 585 Van Den Berg, et al., A common mechanism underlies changes of mind about decisions and  
586 confidence. *Elife* **5**:1–21 (2016).
- 587 Van Schie, H. T., Mars, R. B., Coles, M. G. H. & Bekkering, H. Modulation of activity in medial  
588 frontal and motor cortices during error observation. *Nat. Neurosci.* **7**:549–54 (2004).
- 589 Vocat, R., Pourtois, G. & Vuilleumier, P. Parametric modulation of error-related ERP  
590 components by the magnitude of visuo-motor mismatch. *Neuropsychologia* **49**:360–367  
591 (2011).
- 592 Yeung, N., & Summerfield, C. Metacognition in human decision-making: Confidence and error  
593 monitoring. *Phil. Trans. R. Soc. B*, **367**(1594), 1310-1321 (2012).
- 594 Zylberberg, A., Barttfeld, P., Sigman, M. The construction of confidence in a perceptual decision.  
595 *Front. Integr. Neurosci.i* **6**:1–10 (2012).
- 596



597 **Methods**

598 Software and algorithms

| Reagent or resource | Source                                                                                                                        | Identifier              |
|---------------------|-------------------------------------------------------------------------------------------------------------------------------|-------------------------|
| MATLAB 2017a        | Mathworks<br><a href="http://www.mathworks.com/products/matlab/">http://www.mathworks.com/products/matlab/</a>                | <b>RRID:SCR_001622:</b> |
| SPM12               | <a href="https://www.fil.ion.ucl.ac.uk/spm/software/spm12/">https://www.fil.ion.ucl.ac.uk/spm/software/spm12/</a>             | <b>RRID:SCR_007037</b>  |
| EEGLAB              | <a href="http://sccn.ucsd.edu/eeglab/index.html">http://sccn.ucsd.edu/eeglab/index.html</a>                                   | <b>RRID:SCR_007292</b>  |
| Analyzer            | BrainVision                                                                                                                   | <b>RRID:SCR_002356</b>  |
| R                   | <a href="http://www.r-project.org/">http://www.r-project.org/</a>                                                             | <b>RRID:SCR_001905</b>  |
| ggplot2             | <a href="http://ggplot2.org/">http://ggplot2.org/</a>                                                                         | <b>RRID:SCR_014601</b>  |
| lme4                | <a href="https://cran.r-project.org/web/packages/lme4/index.html">https://cran.r-project.org/web/packages/lme4/index.html</a> | <b>RRID:SCR_015654</b>  |

599

600 CODE AVAILABILITY

601 Matlab and R code for reproducing all analyses can be found on GitHub  
602 ([https://gitlab.com/nfaiivre/analysis\\_public](https://gitlab.com/nfaiivre/analysis_public)).

603 DATA AVAILABILITY

604 All data, analysis and modeling software scripts from this study will be made freely available  
605 upon publication. Anonymized data will be stored on openneuro.org. Unthresholded  
606 statistical maps can be found on NeuroVault (<https://neurovault.org/collections/4676/>)

607

## 608 EXPERIMENTAL MODEL AND SUBJECT DETAILS

609 The experimental paradigm, sample size, and analysis plan detailed below were registered  
610 prior to data collection using the open science framework (<https://osf.io/a5qmv>).

611 Twenty-five healthy volunteers (12 females, mean age =  $24.6 \pm 1.43$ ) from the student  
612 population at the Swiss Federal Institute of Technology took part in this study in exchange  
613 for monetary compensation (20 CHF per hour). All participants were right-handed, had  
614 normal hearing and normal or corrected-to-normal vision, and no psychiatric or neurological  
615 history. They were naive to the purpose of the study and gave informed consent. The study  
616 was approved by the ethical committee of the canton of Geneva, Switzerland (Commission  
617 Cantonale d'Ethique de la Recherche (CCER); study number 2017-00014). Five subjects  
618 were excluded from the analysis: Data from three participants were not analyzed due to  
619 technical issues during recording (high electrode impedance preventing data collection for  
620 safety reasons), and two participants were excluded as they could not perform the first-order  
621 task fast enough. The sample size was predefined based on power analyses conducted on  
622 pilot data, leading to a power of 0.88 (95% CI = 0.80, 0.94) with a sample size of 25  
623 participants.

624

## 625 METHOD DETAILS

### 626 **Experimental paradigm**

627 All stimuli were prepared and presented using Python 2.7. Each trial started with the display  
628 of a  $4^\circ$  by  $4^\circ$  fixation cross presented for 500 to 1500 ms (uniform random distribution,  
629 optimized apriori to maximize design efficiency see Friston et al., 1999). Then two square  
630 boxes (size  $4^\circ$  by  $4^\circ$ ) situated on each side of the fixation cross (center-to-center eccentricity  
631 of  $8^\circ$ ) were flashed for 60 ms. In total, the two boxes contained 100 dots (diameter  $0.4^\circ$ )  
632 distributed unequally among them. Boxes and dots were displayed at maximum contrast on  
633 a black background. In the active condition, participants were asked to indicate which box

634 contained most dots by pressing a key in less than 500 ms (first-order task). Responses  
635 slower than 500 ms were discouraged by playing a loud alarm sound. In the observation  
636 condition, participants were instructed to observe the image of a hand (6° by 6°) performing  
637 the first-order task by appearing on the side of the screen corresponding to one of the two  
638 boxes. They were told that the hand was controlled by a computer performing at about the  
639 same level as them to discriminate the box containing most dots. Responses in the observed  
640 condition corresponded to those in the active condition in a shuffled order, so that accuracy  
641 and response times were kept constant across conditions (see below). After the first-order  
642 response (button press or visual hand onset), a mask composed of two boxes filled with 100  
643 dots each appeared in order to interrupt perceptual processing and ensure that the two  
644 conditions were similar in terms of visual input. After a period of time corresponding to 2 s  
645 from stimulus onset, a visual analog scale appeared instead of the mask, and participants  
646 were asked to use it to report how confident they were about their own first-order response  
647 (active condition), or about the observed first-order response (observation condition). The  
648 scale was shown for 6.5 seconds, with marks at 0 (certainty that the first-order response was  
649 erroneous), 0.5 (unsure about the first-order response) and 1.0 (certainty that the first-order  
650 response was correct). A cursor moved back and forth along the scale at slow speed (3 °/s),  
651 and participants had to press the left button at any moment when the cursor was at their  
652 chosen confidence level. The initial position and direction of the cursor was randomized and  
653 always passed through each position of the scale at least twice so that participants had one  
654 more chance were they to miss the first pass of the cursor.

655 Each experimental run was divided into four blocks of 12 trials, alternating between active  
656 and observation blocks. Each run started with an active block, and first-order responses in  
657 that block were shuffled and replayed in the following observation block. Importantly, the  
658 relation between response times, choice, and perceptual evidence was kept, as we shuffled  
659 trial order only. The experiment comprised six experimental runs, totalizing 144 trials per  
660 condition. During the active condition, the task difficulty was adjusted by an automatic one-

661 up two-down staircase procedure to make the first-order performance rate converge to 71%  
662 (Levitt, 1971). The perceptual difficulty (defined as the difference in the number of dots  
663 between the two boxes) was decreased by one after one incorrect response and increased  
664 by one after two consecutive correct responses. The perceptual difficulty was pre-tuned to  
665 individual perceptual abilities by performing 96 trials of the active condition without  
666 confidence ratings prior to entering the scanner.

667

### 668 **Data collection**

669 EEG data were recorded at 5000 Hz using a 63 channel setup (BrainAmp DC-amplifier,  
670 BrainProducts GmbH, Munich, Germany) synchronized to the scanner's internal clock.  
671 Impedances of all channels were kept below 10K Ohms before entering the scanner. BOLD  
672 signal was recorded in a 3T Prisma Siemens scanner with a 32-channel coil. We used an  
673 EPI sequence (TR = 1280 ms, TE = 31 ms, FA = 64°) with 4x multiband acceleration. We  
674 acquired 64 slices of 2 x 2 x 2 mm voxels without gap (FOV = 215 mm) with slice orientation  
675 tilted 25° backward relative to the AC-PC line so as to include the cerebellum. Structural T1-  
676 weighted images were acquired using a MPRAGE sequence (TR = 2300 ms, TE = 2.32 ms,  
677 FA = 8°) with 0.9 x 0.9 x 0.9 mm voxels (FOV = 240 mm).

678

## 679 **QUANTIFICATION AND STATISTICAL ANALYSIS**

### 680 **Behavioral analysis**

681 Trials in which no first-order (2.0 %) or second-order response (2.9 %) was provided were  
682 excluded. Response times (RT) were defined as the time elapsed between stimulus onset  
683 and response button press (active condition), or onset of the visual hand (observation  
684 condition). Trials with RT smaller than 200 ms or higher than 500 ms (due to the loud sound)  
685 were also excluded from further analysis (13.1 %). Finally, trials from the observation

686 condition during which the participant mistakenly pressed the response button were also  
687 excluded (12.6 %). As the exclusion criteria are not mutually exclusive, this resulted in a final  
688 number of trials of  $119 \pm 5$  trials in the active condition and  $118 \pm 5$  trials in the observation  
689 condition, out of 144 possible trials.

690 All continuous variables were analyzed using mixed effects models, using the lme4 (Bates et  
691 al., 2014) and lmerTest (Kuznetsova et al., 2017) packages in R. Inclusion of random effects  
692 was guided by model comparison and selection based on maximum likelihood ratio tests.  
693 The significance of fixed effects was estimated using Satterthwaite's approximation for  
694 degrees of freedom of F statistics (Luke 2017). All statistical tests were two-tailed.  
695 Metacognitive performance was modeled using mixed effects logistic regression between  
696 first-order accuracy and confidence, with random intercept for participants and random slope  
697 for confidence. The slope of the model was interpreted as a metric for metacognitive  
698 performance (i.e., capacity to adjust confidence based on first-order accuracy). We chose  
699 this framework to analyze confidence as it is agnostic regarding the signals used to compute  
700 confidence estimates (i.e., decisional compared to post-decisional locus, see Yeung &  
701 Summerfield, 2015; Pleskac & Busemeyer, 2011), and the mixed model framework allows  
702 analyzing raw confidence ratings even if they are unbalanced (e.g., in case participants do  
703 not use all possible ratings).

704

#### 705 **fMRI pre-processing and analysis**

706 The functional scans were realigned, resliced and normalized to MNI space using the flow  
707 fields obtained by diffeomorphic anatomical registration through exponential linear algebra  
708 (DARTEL; Ashburner 2007). The normalized scans were smoothed using a Gaussian kernel  
709 of 5 mm full-width at half maximum (FWHM). The pre-processing was done using SPM12.  
710 We modeled the BOLD signal using a general linear model (GLM) with two separate  
711 regressors (stick functions at stimulus onset) for the active and observation condition as well

712 as their spatial and temporal derivatives. We then parametrically modulated the regressors  
713 with three behavioral variables : the confidence ratings, the response times, and the  
714 numerosity difference between the two array of dots (i.e., perceptual evidence). Bad trials as  
715 defined in the behavioral analysis section were modeled by two separate regressors (one for  
716 active and one for observation) and their spatial and temporal derivatives. We added six  
717 realignments parameters as regressors of no interest. All second-level (group-level) results  
718 are reported at a significance-level of  $p < 0.05$  using cluster-extent family-wise error (FWE)  
719 correction with a voxel-height threshold of  $p < 0.001$ . We used the anatomical automatic  
720 labelling (AAL) atlas for brain parcellation (Tzourio-Mazoyer et al., 2002).

721

## 722 **EEG pre-processing**

723 MR-gradient artifacts were removed using sliding window average template subtraction  
724 (Allen et al., 2000). TP10 electrode on the right mastoid was used to detect heartbeats for  
725 ballistocardiogram artifact (BCG) removal using a semi-automatic procedure in BrainVision  
726 Analyzer 2. Data were then filtered using a Butterworth, 4th order zero-phase (two-pass)  
727 bandpass filter between 1 and 10 Hz, epoched [-0.2, 0.6 s] around the response onset (i.e.  
728 the button press in the active condition or the appearance of the virtual hand for in  
729 observation condition), re-referenced to a common average, and input to independent  
730 component analysis (ICA; Makeig et al., 1996) to remove residual BCG and ocular artifacts.  
731 In order to ensure numerical stability when estimating the independent components, we  
732 retained 99% of the variance from the electrode space, leading to an average of 19 (SD = 6)  
733 components estimated for each participant and condition. Independent components (ICs)  
734 were then fitted with a dipolar source localization method (Delorme et al., 2012). ICs whose  
735 dipole lied outside the brain, or resembled muscular or ocular artifacts were eliminated. A  
736 total of 8 (SD = 3) components were finally kept. All preprocessing steps were performed  
737 using EEGLAB and in house scripts under Matlab (The MathWorks, Inc., Natick,  
738 Massachusetts, United States).

739

#### 740 **EEG univariate analysis**

741 EEG evoked potentials were analyzed at the single trial level using a mixed effect linear  
742 regression for each channel and time point. Each model included confidence or uncertainty  
743 as dependent variables, with first-order response times and perceptual evidence (i.e., the  
744 difference in number of dots between the right and left side of the screen) as fixed effects,  
745 and a random intercept by subject. The significance of fixed effects was estimated using  
746 Satterthwaite's approximation for degrees of freedom of F statistics, with family-wise error  
747 correction for multiple comparisons. No random slopes were added to avoid convergence  
748 failures. All analyses were performed using the tidyverse (Wickham 2017) and eegUtils  
749 (Craddock, 2018) environment in R (R core team 2018).

750

#### 751 **EEG multivariate analysis**

752 We derived a low dimensional description of the electrophysiological correlates of  
753 confidence using multivariate pattern analysis on single-trials. We built independent linear  
754 models in the temporal domain for each single sample within the epochs' windows, with all  
755 the independent components retained as features. The models were evaluated using leave-  
756 one-out cross validation to avoid overfitting, and goodness-of-fit was measured by  $R^2$ . The  
757 leave-one-out cross-validation models were also used to define the time point of maximum  
758 decoding capability within two time windows of interest ([50-200] and [200-450] ms post  
759 response). Once this time point was obtained for each window and participant, the  
760 respective EEG values estimated from the linear regressor were fed to an EEG-fMRI  
761 informed analysis (see next section).

762 Chance-level for decoding performance was computed using permutation statistics corrected  
763 for multiple comparisons, by repeating the whole evaluation process 1000 times while  
764 shuffling confidence rating across trials. An empirical, corrected, distribution of the null

765 hypothesis under which  $R^2$  was not significantly different from zero was built by taking, for  
766 each permutation, the maximum and minimum statistics of the  $R^2$  throughout the whole  
767 epoch window evaluated. The corrected measure of chance level was then estimated based  
768 on the desired confidence of this distribution (fixed at  $\alpha = 0.05$ ).

769

## 770 **EEG informed fMRI analysis**

771 To find brain-regions coactivated with decoded confidence, we built a second GLM  
772 consisting of two stick function (one for each condition), parametrically modulated by four  
773 variables; the output of the EEG confidence decoder at two time points post-response  
774 corresponding to peak  $R^2$  confidence decoding during the early (50 ms - 200 ms) and late  
775 (200 ms - 450 ms) time windows, the response time and the numerosity difference of the  
776 trial. We verified that empirical cross-correlation between regressors was low:  $r_{\max} = 0.27 \pm$   
777  $0.05$  and  $r_{\max} = 0.22 \pm 0.04$  for the active and observation conditions. Excluded trials as  
778 defined in the behavioral analysis section were modeled by two separate regressors (one for  
779 active and one for observation) and their spatial and temporal derivatives. We added six  
780 realignments parameters as regressors of no interest. All second-level (group-level) results  
781 are reported at a significance-level of  $p < 0.05$  using cluster-extent family-wise error (FWE)  
782 correction with a voxel-height threshold of  $p < 0.001$ . We used the anatomical automatic  
783 labelling (AAL) atlas for brain parcellation (Tzourio-Mazoyer et al., 2002).

784

## 785 **Behavioral modeling**

786 Our models of confidence build upon a race accumulator model predicting first-order  
787 response times and choice accuracy; for every time point  $t$  (sampled at a frequency of 1000  
788 Hz), each accumulator corresponded to the cumulative sum of independent draws from a  
789 normal distribution with unit variance and mean equal to the drift rate ( $v$  and  $-v$  for congruent  
790 and incongruent choices). The decision bound was modeled as a fixed threshold  $B$ . Non-



791 decision times were modeled by a normal distribution with mean  $tnd$  and standard deviation  
792  $tnd\_std$ . To model early errors, we added starting point variability; we allowed each  
793 accumulator to start in a non-zero state, uniformly distributed between 0 and  $zvar$  time the  
794 decision bound  $B$  (Purcell & Kiani, 2016).

795 At each iteration of the optimization procedure (see below), we generated  $N=1000$  surrogate  
796 trials consisting in the state of the two accumulators over time and corresponding choice and  
797 RT. All parameters were fitted for the active condition, through a Nelder-Mead simplex log-  
798 likelihood minimization, comparing observed and simulated distribution of response times  
799 with a Kolmogorov-Smirnov test. To separate correct and error trials, the sign of RT was  
800 inverted for error trials. We constrained the parameters to positive values by applying an  
801 exponential transformation of the variables  $f(x) = \exp(x)$ , except for non-decision time and  
802 non-decision time variability which were constrained to  $[0,1]$  s by a sigmoid transformation  
803  $f(x) = 1/(1+\exp(-x))$ .

804 As the state of the evidence accumulation is unconstrained, we used a second stage fitting  
805 procedure to map these values to the 0-1 confidence scale. For the active condition, we  
806 sampled evidence for confidence as the state of the winning accumulator at a latency  
807 corresponding to peak performance in EEG decoded confidence. We divided the non-  
808 decision time into a sensory and an 80ms motor component (Resulaj et al.,2008). We  
809 assumed that if EEG predicted confidence best around 320 ms after the RT, then confidence  
810 would depend on the state of the accumulators  $320 + 80 = 400$  ms after the choice. To map  
811 the evidence to a 0 - 1 confidence scale, we used a sigmoid function:

$$812 \quad C = \exp((x_1E + x_2))/(1 + \exp(x_1E + x_2)),$$

813 With  $C$  the resulting simulated confidence,  $E$  the accumulated evidence and  $x_1$ ,  $x_2$  two  
814 free parameters corresponding to the sensitivity and the bias of the mapping.

815 For the observation condition, we assumed that confidence was readout from an identical  
816 evidence accumulation process, albeit disconnected from the computer's decisions (and

817 response times). We thus simulated an additional 1000 surrogate trials for the observation  
818 condition but time-locked the post-decisional readout of confidence to the shuffled RTs from  
819 the active condition. The confidence readout was based on the accumulator with highest  
820 value, thus assuming a covert decision at the time of the read-out. We then fitted the  
821 parameters of the mapping as in the active condition but inverting confidence ( $c' = 1-c$ )  
822 when the chosen accumulator deferred from the computer's decision.

## 823 **Additional references**

- 824 Allen, P.J., Josephs, O. & Turner, R. A. Method for removing imaging artifact from continuous  
825 EEG recorded during functional MRI. *Neuroimage* **239**:230–239 (2000).
- 826 Ashburner, J. A fast diffeomorphic image registration algorithm. *Neuroimage* **38**:95–113 (2007).
- 827 Bates, D., Maechler, M. Bolker, B. & Walker, S. lme4: Linear mixed-effects models using Eigen  
828 and S4. R package version **1**(7), 1-23 (2014).
- 829 Craddock, M. eegUtils: A collection of utilities for EEG analysis. R package version 0.1.13.  
830 <https://github.com/craddm/eegUtils> (2018)
- 831 Delorme, A., Palmer, J., Onton, J., Oostenveld, R., & Makeig, S. Independent EEG sources are  
832 dipolar. *PLoS one*, **7**(2), e30135 (2012).
- 833 Friston, K. J., Zarahn, E. O. R. N. A., Josephs, O., Henson, R. N., & Dale, A. M. Stochastic  
834 designs in event-related fMRI. *Neuroimage*, **10**(5):607-619 (1999).
- 835 Kuznetsova, A., Brockhoff, P. B., & Christensen, R. H. B. lmerTest package: tests in linear mixed  
836 effects models. *Journal of Statistical Software* **82**(13) (2017).
- 837 Levitt, H. C. C. H. Transformed up-down methods in psychoacoustics. *The Journal of the*  
838 *Acoustical society of America* **49**(2B): 467-477 (1971).
- 839 Luke, S. G. Evaluating significance in linear mixed-effects models in R. *Behavior Research*  
840 *Methods* **49**(4), 1494-1502 (2017).
- 841 Makeig, S., Bell, A. J., Jung, T. P., & Sejnowski, T. J. Independent component analysis of  
842 electroencephalographic data. *Advances in neural information processing systems* pp.  
843 145-151 (1996).
- 844 Purcell, B. A. & Kiani, R. (2016). Neural mechanisms of post-error adjustments of decision policy  
845 in parietal cortex. *Neuron*, **89**(3), 658-671.
- 846 R Core Team. R: A language and environment for statistical computing. R Foundation for  
847 Statistical Computing, Vienna, Austria. URL <https://www.R-project.org/> (2018).
- 848 Resulaj, A., Kiani, R., Wolpert, D. M., & Shadlen, M. N. Changes of mind in decision-making.  
849 *Nature*, **461**(7261), 263 (2009).
- 850 Tzourio-Mazoyer, et al., Automated anatomical labeling of activations in SPM using a  
851 macroscopic anatomical parcellation of the MNI MRI single-subject  
852 brain. *Neuroimage* **15**(1), 273-289 (2002).

- 853 Vickers D. Decision Processes in Visual Perception. New York, NY: Academic Press (1979).
- 854 Wickham, H. tidyverse: Easily Install and Load the 'Tidyverse'. R package version 1.2.1.
- 855 <https://CRAN.R-project.org/package=tidyverse> (2017)
- 856

Acknowledgements: O.B. is supported by the Bertarelli Foundation, the Swiss National Science Foundation, and the European Science Foundation. D.V. is supported by the Bertarelli Foundation and the Swiss National Science Foundation. The authors are grateful to Roberto Martuzzi, Loan Mattera, Gwénaél Birot and Gisong Kim for their help during data acquisition. We thank Elisa Filevich and Roy Salomon for constructive comments on the manuscript.

Author Contributions: MP, NF, II developed the study concept and contributed to the study design. Testing and data collection were performed by MP, NF, II, AD, LS, SM, and MW. MP, NF, II and LS performed the data analysis. MP performed modeling work. MP, NF and II drafted the paper; all authors provided critical revisions and approved the final version of the paper for submission.

The authors declare no competing interests.
